# Supplementary material for: Genetischer Einfluss auf die Varianz im prosozialen Verhalten
Source: Atypon-hosted journal article supplement (doi:10.1026/0942-5403/a000230), 2017-05-31
Supplement: 0942-5403_a000230_esm1.pdf [file 0942-5403_a000230_esm1.pdf]

## **Elektronischer Anhang**

### **Molekulargenetische Studien mit Fokus auf prosozialem Verhalten**

Möchte man in Erfahrung bringen, welche Gene prosoziales Verhalten beim Menschen beeinflussen, eignen sich auf molekulargenetischer Ebene sowohl Kandidatengenstudien als auch genomweite Ansätze. Bei Kandidatengenstudien werden Gene mit bereits bekannter bzw. potentiell plausibler Funktion für prosoziales Verhalten herangezogen (vgl. Day & Loos, 2011). Bei genomweiten Ansätzen werden über alle Gene hinweg verschiedene Polymorphismen, d.h. verschiedene Varianten der Gene, im Zusammenhang mit dimensional erfasstem prosozialem Verhalten untersucht (Attia et al., 2009a; Day & Loos, 2011).

Es erfolgte eine Suche in drei verschiedenen Datenbanken (Medline, Psycinfo, Scopus) mittels folgender Verknüpfung als Suchterm: ("prosocial behaviour" OR "prosocial behavior") AND (genetic\* OR heritability OR twin\*). Zudem wurden die Referenzen der eingeschlossenen Artikel durchsucht. Für die qualitative Übersicht der molekulargenetischen Studien (Tabelle A1) wurden nur diejenigen Arbeiten, 1) die spezifisch „prosoziales Verhalten“ wie Kooperieren, Teilen oder Helfen basierend auf Fragebögen oder direkter Verhaltensbeobachtung betrachteten, und 2) bei denen eine Assoziation eines bestimmten Genes bzw. einer Gen-Variante mit prosozialem Verhalten berechnet wurde, eingeschlossen. Hingegen reine Gen-Umwelt-Interaktionen wurden nicht in der Übersicht beachtet. Zudem wurde auf der Internetseite des „National Human Genome Research Institute“ (Hindorff et al., letzter Zugriff 09.12.2016) nach genomweiten Assoziationsstudien für „prosoziales Verhalten“ und „Altruismus“ gesucht.

Es konnten sieben molekulargenetische Studien identifiziert werden, in denen insgesamt fünf Gene bzw. spezifische Varianten/Polymorphismen auf Assoziation mit prosozialem Verhalten untersucht wurden (Tabelle A1). Bei vier der fünf untersuchten Gene handelt es sich um das Oxytocin Rezeptor Gen (*OXTR*; Israel et al., 2009; Apicella et al., 2010), das Vasop-

ressin-Rezeptor-Gen (*AVPR1a*; Knafo et al., 2008), das Serotonintransporter-Gen (*SLC6A4*; Stoltenberg, Christ & Carlo, 2013) und das Dopamin-4-Rezeptor-Gen (*DRD4*; Knafo et al., 2011; Tabelle A1), also um Gene, die auf Grund vorhergehender Untersuchungen eine potenzielle Relevanz bei der Erklärung der Varianz von prosozialem Verhalten besitzen könnten (Kandidatengenansatz).

*OXTR* beispielsweise wird als geeignetes Kandidatengen betrachtet, da das Neuropeptid Oxytocin (d. h. der Ligand von *OXTR*) bei einigen Wirbeltieren inklusive des Menschen als Modulator des sozialen und reproduktiven Verhaltens gilt (Tost et al., 2010). So konnte gezeigt werden, dass die Gabe von Oxytocin Verhaltensweisen wie Großzügigkeit (Zak & Stanton, 2007) oder Vertrauen (Kosfeld, Heinrichs, Zak, Fischbacher & Fehr, 2005) in andere Personen verstärkt (Tost et al., 2010). Israel und Kollegen (2009) untersuchten 15 Varianten (hier Einzelnukleotidaustausche, sog. SNPs) des *OXTR* in Assoziation zu prosozialem Verhalten bei israelischen Studenten und Studentinnen (Ursprungskollektiv). Prosoziales Verhalten wurde hier im Diktator-Spiel und der Social Value Orientation Task ermittelt. Im Diktator-Spiel gibt es zwei Spieler: einen Diktator und einen Rezipienten. Der Diktator kann entscheiden wie ein bestimmter Geldbetrag zwischen beiden Spielern aufgeteilt wird. Er braucht nichts abgeben, kann aber. Der Rezipient hat somit eine rein passive Rolle. Bei der Social Value Orientation Task werden verschiedene Verteilungsoptionen zwischen zwei Spielern vorgegeben, die in der Aufteilung von Geldbeträgen variieren. Die Spieler werden dann gebeten, eine Option auszuwählen. Basierend darauf werden unterschiedliche Teil-Typen bestimmt (Altruist, Egoist, Wettkämpfer; siehe Van Lange, 1999). Drei der 15 SNPs, die im Ursprungskollektiv eine signifikante (d. h. für die Anzahl der getesteten SNPs korrigierter  $p$ -Wert; rs1042778) bzw. nominale (d. h.  $p < 0,05$ ; rs2268490, rs237887) Assoziation zeigten, wurden in einem unabhängigen Kollektiv von jungen Frauen weiterverfolgt. Dabei konnte nur die Assoziation für rs1042778 bestätigt werden (Israel et al., 2009; Tabelle A1). Apicella und

Kollegen (2010) untersuchten ebenfalls SNPs des *OXTR* (darunter auch rs1042778) in Assoziation zu prosozialem Verhalten. Auch hier fand das Diktator Spiel Einsatz. Über das gesamte Kollektiv hinweg fanden die Autoren für keinen dieser SNPs eine Assoziation (Apicella et al. 2010; Tabelle A1). Somit konnte der Befund von Israel und Kollegen (2009) in diesem Kollektiv nicht repliziert werden.

In den anderen Kandidatengenstudien untersuchten die Autoren verschiedene Längen bekannter Repeats (kurze sich in unterschiedlicher Anzahl wiederholende DNA-Sequenzen) in Assoziation mit prosozialem Verhalten (Tabelle A1). Der *DRD4-III* Polymorphismus beispielsweise besteht aus einer Sequenz von 48 Basenpaaren. Diese Sequenz kann sich zwei- bis achtmal wiederholen. Knafo und Kollegen (2011) verglichen Personen des *DRD4-III* 7er Repeats mit Personen, die mehr oder weniger als sieben Wiederholungen dieser Sequenz besaßen, und fanden durch Verhaltensbeobachtung sowie basierend auf Fremdbeurteilung seitens der Mutter (mittels SDQ) bei 3,5-jährigen Kindern keine Assoziation zu prosozialem Verhalten (Tabelle A1). DiLalla, Elam & Smolen (2009) hingegen verglichen 3-jährige Kinder mit sechs und mehr Wiederholungen dieser Sequenz gegen jene mit weniger als sechs Wiederholungen. Die Kinder mit der geringen Anzahl an Wiederholungen waren dabei prosozialer. Bei den 5-jährigen Kindern jedoch zeigte sich keine Assoziation (DiLalla et al., 2009; Tabelle A1).

Im Gegensatz zum klassischen Kandidatengenansatz verglichen Pride, Crawford, Payne & North (2013) Patienten mit Neurofibromatose Typ 1 (NF1) mit gesunden Kontrollen bezüglich ihres prosozialen Verhaltens. NF1 ist eine autosomal dominant vererbte Erkrankung, welche mit Mutationen im *NF1* Gen einhergeht (Ponder, 1990). Bei den Patienten ist vorrangig die Haut und das Nervensystem betroffen (Pride et al., 2013). Zudem fallen Patienten mit NF1 durch Probleme im Sozialverhalten auf (Noll et al., 2007). Pride und Kollegen (2013) ermittelten, dass NF1 Patienten tendenziell niedrigere Werte bei Selbstauskunft und signifi-

kant niedrigere Werte bei Fremdauskunft mittels des Social Performance Survey Schedule (SPSS; Lowe & Cautela, 1978) hatten (Tabelle A1).

Genomweite Assoziationsstudien für „prosoziales Verhalten“ oder „Altruismus“ konnten weder über die allgemeine Suchstrategie, noch über die gezielte Suche auf der Internetseite des „National Human Genom Research Institutes“ (Hindorff et al., 09.12.2016) gefunden werden.

Trotz des moderaten Einflusses genetischer Faktoren konnten auf molekulargenetischer Ebene bisher noch keine Genvarianten identifiziert bzw. zuverlässig validiert werden, die mit prosozialem Verhalten assoziiert sind. In sechs der sieben Studien berichteten die Autoren von – meist nominalen – Assoziationen bestimmter Genvarianten mit prosozialem Verhalten. Israel und Kollegen (2009) konnten zwar den SNP mit der stärksten Assoziation (rs1042778) in einem unabhängigen Kollektiv bestätigen, allerdings konnte diese Assoziation nicht durch Apicella und Kollegen (2010) in einem anderen Kollektiv repliziert werden. Auf Grund der relativ geringen Fallzahl in den Kollektiven kann es sich jeweils um Zufallsbefunde handeln (Ioannidis, 2007). In beiden Studien wurde das Diktator-Spiel zur Ermittlung von prosozialem Verhaltens eingesetzt. Allerdings unterschieden sich die Kollektive bezüglich ihrer geografischen Herkunft. Im ersten Fall handelte es sich um ein israelisches Kollektiv und im letzteren um ein schwedisches. Demnach unterschieden sich Genpool und Umweltbedingungen. Es könnte also sein, dass es sich bei rs1042778 bei Israel et al. (2009) um einen kausalen Effekt handelt, der nur in einer bestimmten Umwelt auftritt (Apicella et al., 2010). Darüber hinaus ist möglich, dass es sich bei rs1042778 nicht um die eigentliche kausale Variante handelt, sondern dass die kausale Variante mit großer Wahrscheinlichkeit zusammen mit rs1042778 vererbt wird. Es könnte sein, dass zwischen den beiden Studienpopulationen die Wahrscheinlichkeit, dass beide Varianten gemeinsam vererbt werden, unterschiedlich groß ist, und deshalb der Effekt nur in einer Studienpopulation gefunden wurde (Ioannidis, 2007; Apicella et

al., 2010). Weitere Replikationen könnten darüber Aufschluss geben, ob es sich bei diesem SNP um einen validen Befund handelt.

Bei den restlichen Polymorphismen handelt es sich lediglich um Erstbefunde, die noch einer Validierung in weiteren Kollektiven bedürfen, ehe über deren potentielle biologisch funktionelle Bedeutung im Rahmen von prosozialem Verhalten spekuliert werden sollte.

NF1, eine neurokutane Erkrankung, geht auf autosomal-dominante Mutationen in *NF1* zurück. In der Kindheit kann NF1 mit sozialen Problemen wie Einsamkeit, verstärkte Anhänglichkeit oder Unreife einhergehen (Pride et al., 2013). Pride und Kollegen (2013) haben zudem gezeigt, dass erwachsene NF1 Patienten weniger prosozial sind. Ob dieser Befund einen direkten kausalen Zusammenhang zwischen den *NF1* Mutationen und prosozialem Verhalten widerspiegelt, oder ob das geringere prosoziale Verhalten der Patienten eine indirekte Folge der Grunderkrankung ist, lässt sich an dieser Stelle nicht beantworten. Nichtsdestoweniger könnte die Studie von Pride und Kollegen (2013) einen Hinweis darauf gegeben, dass *NF1* als Kandidatengen für prosoziales Verhalten in Zukunft näher in Betracht gezogen werden sollte.

Insgesamt lieferten die Kandidatengenstudien bisher keine validen Befunde, um den genetischen Anteil an der Varianz von prosozialem Verhalten zu erklären. Wie bei anderen komplexen Merkmalen auch, kann bei prosozialem Verhalten von polygenen Effekten ausgegangen werden, d. h., mehrere Gene leisten jeweils einen kleinen Beitrag (Plomin, Owen & McGuffin, 1994). In dieser Hinsicht wären gut gepowerte genomweite Assoziationsstudien eine vielversprechende Methode, um Genvarianten mit kleinen Effekten aufzufinden (Attia et al., 2009b; Manolio, 2010).

**Tabelle A1.** Molekulargenetische Studien mit Fokus auf prosozialem Verhalten

| Referenz             | Land     | Studienpopulation <sup>1</sup>               | Alter in Jahren (MW ± SD oder Altersspanne) | Messinstrument für prosoziales Verhalten <sup>2</sup>       | Gen <sup>3</sup> | Polymorphismus <sup>4</sup>                    | Risikoallele/-Genotyp (=Träger dieses Allels/Genotyps sind prosozialer) <sup>5</sup> | anderes Allel/andere Allele | Assoziation (Gesamtkollektiv)                                                       | Extras                                                                                                                         | unabhängige Bestätigung                                                                                                                                                                             |
|----------------------|----------|----------------------------------------------|---------------------------------------------|-------------------------------------------------------------|------------------|------------------------------------------------|--------------------------------------------------------------------------------------|-----------------------------|-------------------------------------------------------------------------------------|--------------------------------------------------------------------------------------------------------------------------------|-----------------------------------------------------------------------------------------------------------------------------------------------------------------------------------------------------|
| Israel et al. 2009   | Israel   | 102 Männer, 101 Frauen                       | 26,0 ± 3,7                                  | Diktator-Spiel (DG) und Social Value Orientation Task (SVO) | OXTR             | rs1042778                                      | G                                                                                    | T                           | $p(\text{DG}) = 0,016$ ,<br>$p(\text{SVO}) = 0,031$                                 | $p$ -Werte korrigiert für multiples Testen (Bonferroni-Korrektur)                                                              | unabhängige Bestätigung der Initialbefunde in 98 Frauen (34,5 ± 4,8 Jahre); DG als Messinstrument; unabhängige Bestätigung nur für rs1042778: $p(\text{DG}) = 0,004$ / gleiche Richtung des Effekts |
|                      |          |                                              |                                             |                                                             |                  | rs2268490                                      | C                                                                                    | T                           | $p(\text{DG}) = 0,0111$ ,<br>$p(\text{SVO}) = 0,0083$                               | $p$ -Werte nicht korrigiert für multiples Testen (Bonferroni-Korrektur)                                                        |                                                                                                                                                                                                     |
|                      |          |                                              |                                             |                                                             |                  | rs237887                                       | G                                                                                    | A                           | $p(\text{DG}) = 0,0048$ ,<br>$p(\text{SVO}) = 0,0250$                               | $p$ -Werte nicht korrigiert für multiples Testen (Bonferroni-Korrektur)                                                        |                                                                                                                                                                                                     |
|                      |          |                                              |                                             |                                                             |                  | 12 weitere SNPs                                |                                                                                      |                             | keine Assoziation                                                                   | nominale Assoziation bei 4 SNPs nur bei geschlechtsgetrennter Analyse                                                          |                                                                                                                                                                                                     |
|                      |          |                                              |                                             |                                                             |                  | Haplotyp rs9840864-rs237888-rs2268490-rs237887 | k.A.                                                                                 | k.A.                        | $p(\text{DG}) = 0,005$ ,<br>$p(\text{SVO}) = 0,029$ ,<br>$p(\text{DG+SVO}) = 0,038$ |                                                                                                                                |                                                                                                                                                                                                     |
|                      |          |                                              |                                             |                                                             |                  | restliche 11 Haplotypkonstellationen           | k.A.                                                                                 | k.A.                        | keine Assoziation                                                                   |                                                                                                                                |                                                                                                                                                                                                     |
| Apicella et al. 2010 | Schweden | 684 (270 MZ ZP, 60 DZ ZP, 24 Einzelpersonen) | k.A.                                        | DG                                                          | OXTR             | 9 SNPs darunter rs1042778                      | k.A.                                                                                 | k.A.                        | keine Assoziation                                                                   | 1 SNP (rs75775, T-Allel) bei geschlechtsgetrennter Analyse bei Männern mit geringerer Prosozialität assoziiert ( $p < 0,001$ ) |                                                                                                                                                                                                     |

|                         |            |                                 |                         |                                                                                                         |        |                                 |                                                                   |                                                                                                                           |                            |                                                                              |  |
|-------------------------|------------|---------------------------------|-------------------------|---------------------------------------------------------------------------------------------------------|--------|---------------------------------|-------------------------------------------------------------------|---------------------------------------------------------------------------------------------------------------------------|----------------------------|------------------------------------------------------------------------------|--|
| Knafo et al. 2008       | Israel     | 102 Männer, 101 Frauen          | 26,0 ± 3,7              | DG                                                                                                      | AVPR1a | RS3 <sup>a</sup>                | L (= 327-343 bp)                                                  | S (= 308-325 bp)                                                                                                          | p = 0,025                  |                                                                              |  |
|                         |            |                                 |                         | Bardi-Schwartz Universalism Value-expressive Behavior scale (Bardi & Schwartz 2003; Selbsteinschätzung) |        |                                 | L (= 327-343 bp)                                                  | S (= 308-325 bp)                                                                                                          | p = 0,035 für beide Skalen |                                                                              |  |
| Stoltenberg et al. 2013 | USA        | 105 Männer, 293 Frauen          | 20,8 ± 3,6              | 14-item measure of helping (Rushton et al. 1981)                                                        | SLC6A4 | 5-HTTLPR + rs25531 <sup>a</sup> | L' (= langer Repeat des 5-HTTLPR und rs25531A), S' = L(G) oder S) | S' = L(G) und S; L(G) = kurzer Repeat des 5-HTTLPR und rs25531G S = langer Repeat des 5-HTTLPR + beide Allele von rs25531 | p = 0,041                  |                                                                              |  |
| DiLalla et al. 2009     | USA        | 32 Mädchen, 27 Jungen           | 3                       | Bestimmung der Interaktion zwischen Eltern und beiden Zwillingen durch Verhaltensbeobachtung            | DRD4   | DRD4-III <sup>c</sup>           | S (= weniger als 6 Repeats)                                       | L (= 6 oder mehr Repeats)                                                                                                 | p < 0,05                   | Längsschnittstudie; nicht miteinander verwandter Kinder aus Zwillingskohorte |  |
|                         |            | 20 Mädchen, 13 Jungen           | 5                       | Interaktion eines Zwillinges mit unbekanntem Peer durch Verhaltensbeobachtung                           |        |                                 |                                                                   |                                                                                                                           | keine Assoziation          |                                                                              |  |
| Knafo et al. 2011       | Israel     | 45 MZ ZP, 123 DZ ZP             | 3,5 (43,8 ± 3,3 Monate) | Verhalten durch Verhaltensbeobachtung und SDQ (Mutter)                                                  | DRD4   | DRD4-III <sup>c</sup>           | 7R                                                                | non-7R                                                                                                                    | keine Assoziation          | s. auch Tabelle 1 im Artikel                                                 |  |
| Pride et al. 2013       | Australien | 62 NF1 Patienten, 39 Kontrollen | 18-60                   | Selbstauskunft mittels Social Performance Survey Schedule (SPSS; Lowe und Cautala 1978)                 | NF1    | NF1 Gen                         | NF1 mit krankheitsverursachenden Mutationen                       | NF1 ohne krankheitsverursachende Mutationen                                                                               | Tendenz                    |                                                                              |  |
|                         |            |                                 |                         | Fremdauskunft durch nahestehende Person mittel Observer Version des SPSS                                |        |                                 |                                                                   |                                                                                                                           | p < 0,01                   |                                                                              |  |

<sup>1</sup> ZP, Zwillingspaare

<sup>2</sup> DG, Diktator-Spiel; SPSS, Social performance Survey Schedule; SVO= Social Value Orientation Task

- <sup>3</sup> *AVPR1a*, Vasopressin-Rezeptor-Gen; *DRD4*, Dopamin-4-Rezeptor-Gen; *NF1*, Neurofibromatose 1 Gen; *OXTR*, Oxytocin Rezeptor Gen; *SLC6A4*, Serotonintransporter-Gen
- <sup>4</sup> Ein Polymorphismus bezeichnet die Existenz von zwei oder mehr Varianten eines Genes in einer Population. Im Einfachsten und häufigsten Fall handelt es sich um einen Einzelnukleotidaustausch, welcher mit einer rs-Nummer gekennzeichnet ist, und sich auf eine bestimmte Stelle im Genom bezieht. Daneben existieren Haplotypen (=Allele, die vermeintlich auf demselben Chromosom liegen, da deren SNPs in der Nähe lokalisiert sind, und deshalb miteinander vererbt werden können) und kurze, sich in variabler Anzahl wiederholende DNA-Sequenzen (=Repeats)
- <sup>a</sup> RS3: komplexe, sich mehrfach wiederholende Sequenz ((CT)<sub>4</sub>-TT-(CT)<sub>8</sub>-(GT)<sub>24</sub>)
- <sup>b</sup> 5-HTTLPR (=serotonin-transporter-linked polymorphic region): Region, die in einer kurzen (S) oder langen (L) Variante auftritt, in Kombination mit dem SNP rs25531 (bestehend aus den Allelen A oder G)
- <sup>c</sup> *DRD4-III*: Sequenz über 48 Basenpaaren, die sich zwei- bis achtmal wiederholen kann
- <sup>5</sup> Ein Allel ist eine von mehreren Varianten eines Genes; meist bezieht es sich auf eine bestimmte Stelle im Gen, z.B. eine Variante eines Einzelnukleotidaustausches; A, T, G, C, Basen des DNA-Stranges



## Referenzen

- Apicella, C. L., Cesarini, D., Johannesson, M., Dawes, C. T., Lichtenstein, P., Wallace, B. et al. (2010). No association between oxytocin receptor (OXTR) gene polymorphisms and experimentally elicited social preferences. *PLoS One*, 5(6), e11153.
- Attia, J., Ioannidis, J. P., Thakkinstian, A., McEvoy, M., Scott, R. J., Minelli, C. et al. (2009a). How to use an article about genetic association: A: Background concepts. *Journal of the American Medical Association*, 301(1), 74-81.
- Attia, J., Ioannidis, J. P., Thakkinstian, A., McEvoy, M., Scott, R. J., Minelli, C. et al. (2009b). How to use an article about genetic association: C: What are the results and will they help me in caring for my patients? *Journal of the American Medical Association*, 301(3), 304-8.
- Day, F.R. & Loos, R. J. (2011). Developments in obesity genetics in the era of genome-wide association studies. *Journal of Nutrigenetics and Nutrigenomics*, 4(4), 222-38.
- Hindorff, L.A., MacArthur, J. (European Bioinformatics Institute), Morales, J. (European Bioinformatics Institute), Junkins, H.A., Hall, P.N., Klemm, A.K. et al. A Catalog of Published Genome-Wide Association Studies. Available at: [www.genome.gov/gwastudies](http://www.genome.gov/gwastudies). Accessed [09.12.2016]
- Ioannidis, J. P. (2007). Non-replication and inconsistency in the genome-wide association setting. *Human Heredity*, 64(4), 203-13.
- Israel, S., Lerer, E., Shalev, I., Uzefovsky, F., Riebold, M., Laiba, E. et al. (2009). The oxytocin receptor (OXTR) contributes to prosocial fund allocations in the dictator game and the social value orientations task. *PLoS One*, 4(5), e5535.
- Knafo, A., Israel, S., Darvasi, A., Bachner-Melman, R., Uzefovsky, F., Cohen, L., et al. (2008). Individual differences in allocation of funds in the Dictator Game and postmortem

- hippocampal mRNA levels are correlated with length of the arginine vasopressin 1a receptor (AVPR1a) RS3 promoter-region repeat. *Genes, Brain, and Behavior*, 7, 266–275.
- Knafo, A., Israel, S. & Ebstein, R. P. (2011). Heritability of children's prosocial behavior and differential susceptibility to parenting by variation in the dopamine receptor D4 gene. *Development and Psychopathology*, 23(1), 53-67.
- Kosfeld, M., Heinrichs, M., Zak, P. J., Fischbacher, U. & Fehr, E. (2005). Oxytocin increases trust in humans. *Nature*, 435(7042), 673-6.
- Manolio, T. A. (2010) Genomewide association studies and assessment of the risk of disease. *New England Journal of Medicine*, 363(2), 166-76.
- Ponder, B. (1990). Human genetics. Neurofibromatosis gene cloned. *Nature*, 346(6286), 703-4.
- Pride, N. A., Crawford, H., Payne, J. M. & North, K. N. (2013). Social functioning in adults with neurofibromatosis type 1. *Research in Developmental Disabilities*, 34(10), 3393-9.
- Tost, H., Kolachana, B., Hakimi, S., Lemaitre, H., Verchinski, B. A., Mattay, V. S. et al. (2010). A common allele in the oxytocin receptor gene (OXTR) impacts prosocial temperament and human hypothalamic-limbic structure and function. *Proceedings of the National Academy of Sciences U S A*, 107(31), 13936-41.
- Van Lange, P. A. M. (1999) The pursuit of joint outcomes and equality in outcomes: An integrative model of social value orientation. *Journal of Personality and Social Psychology* 77, 337–349.
- Zak, P. J. & Stanton, A.A. (2007). Ahmadi S. Oxytocin increases generosity in humans. *PLoS One*, 2(11), e1128.
